1 **Relationship between social support and resilience among nurses: a systematic**  
2 **review**

3

4 **Petros Galanis**, Assistant Professor, Clinical Epidemiology Laboratory, Faculty of  
5 Nursing, National and Kapodistrian University of Athens, Athens, Greece

6 **Aglaia Katsiroumpa**, RN, MSc, Clinical Epidemiology Laboratory, Faculty of  
7 Nursing, National and Kapodistrian University of Athens, Athens, Greece

8 **Irene Vraka**, MD, PhD, Department of Radiology, P & A Kyriakou Children's  
9 Hospital, Athens, Greece

10 **Olga Siskou**, Assistant Professor, University of Piraeus, Piraeus, Greece

11 **Olympia Konstantakopoulou**, Economist, MSc, PhD, Center for Health Services  
12 Management and Evaluation, Faculty of Nursing, National and Kapodistrian  
13 University of Athens, Athens, Greece

14 **Theodoros Katsoulas**, Associate Professor, Faculty of Nursing, National and  
15 Kapodistrian University of Athens, Athens, Greece

16 **Daphne Kaitelidou**, Professor, Center for Health Services Management and  
17 Evaluation, Faculty of Nursing, National and Kapodistrian University of Athens,  
18 Athens, Greece

19

20 **Corresponding author:** Petros Galanis, Assistant Professor, Clinical Epidemiology  
21 Laboratory, Faculty of Nursing, National and Kapodistrian University of Athens, 123  
22 Papdiamantopoulou street, GR-11527, Athens, Greece, e-mail: [pegalan@nurs.uoa.gr](mailto:pegalan@nurs.uoa.gr),  
23 <https://orcid.org/0000-0002-1308-5782>

24

1 **Abstract**

2 **Background:** High levels of stress and anxiety in nurses negatively affect their  
3 physical and mental health and lead to poor job performance, limited job satisfaction,  
4 high levels of burnout and increased intention to leave the profession. By promoting  
5 resilience in nurses it is possible to reduce negative consequences for those working  
6 in highly stressful workplaces.

7 **Objective:** To summarize the evidence about the relationship between social support  
8 and resilience among nurses.

9 **Methods:** We performed a systematic review according to the Preferred Reporting  
10 Items for Systematic Reviews and Meta-Analysis (PRISMA) guidelines. We searched  
11 Pubmed, Medline, Scopus, Web of Science, and Cinahl from inception to August 28,  
12 2022 using the following search strategy in all fields: ((resilience) AND ("social  
13 support")) AND (nurses).

14 **Results:** Applying the inclusion criteria, we found six studies that investigated the  
15 relationship between social support and resilience among nurses. Two studies were  
16 conducted in China, two studies in Turkey, one study in Haiti, and one study in  
17 Taiwan. All studies were cross-sectionals and used convenience samples. All studies  
18 found a positive relationship between social support and resilience among nurses. In  
19 studies that used multivariable analysis, coefficient beta ranged from 0.13 to 0.69,  
20 while in studies that used correlation analysis, correlation coefficient ranged from  
21 0.18 to 0.37.

22 **Conclusions:** We found that social support improves resilience among nurses. It is  
23 necessary to make systematic efforts to support nurses especially in the workplace.  
24 This need is even greater for inexperienced nurses, as it is more difficult for them to  
25 cope effectively with the difficulties of the profession. A harmonious working

1 environment is essential to reduce the psychological pressure of nurses and improve  
2 job performance.

3

4 **Keywords:** nurses, resilience, social support, systematic review

5

6

7

8

## 1 **Introduction**

2 The ever-increasing professional demands on nurses, combined with the shortages in  
3 nursing staff in most countries, are leading nurses to considerable strain and often  
4 even burnout (Watson et al., 2008). This situation affects negatively both nurses and  
5 clients of healthcare services.

6 High levels of stress and anxiety in nurses negatively affect their physical and mental  
7 health and lead to poor job performance, limited job satisfaction, high levels of  
8 burnout and increased intention to leave the profession (Edwards et al., 2010; Rogers  
9 et al., 2004). Resilience can reduce stress, anxiety, burnout and intention to leave the  
10 profession, as well as has a positive effect on nurses' physical and mental health  
11 (Cameron & Brownie, 2010; Matos et al., 2010; Mealer et al., 2012).

12 Resilience is defined as the ability of individuals to successfully cope with various  
13 stressful situations, particularly their ability to recover after highly traumatic  
14 situations such as the loss of a loved one (Jackson et al., 2007).

15 Resilience in the case of nurses is essential as it enables them to perceive meaning in  
16 their work and experiences and to mitigate the effects of the traumatic situations they  
17 face in the workplace (McAllister & McKinnon, 2009).

18 By promoting resilience in nurses it is possible to reduce negative consequences for  
19 those working in highly stressful workplaces (McCann et al., 2013). In fact, increased  
20 resilience plays an even more important role for nurses in the early years of their  
21 careers by significantly reducing their intention to leave the profession (Phillips et al.,  
22 2014).

23 Therefore, we conducted a systematic review to summarize the evidence about the  
24 relationship between social support and resilience among nurses.

25

## 1 **Methods**

2 We searched Pubmed, Medline, Scopus, Web of Science, and Cinahl from inception  
3 to August 28, 2022 using the following search strategy in all fields: ((resilience) AND  
4 ("social support")) AND (nurses). We performed the systematic review according to  
5 the Preferred Reporting Items for Systematic Reviews and Meta-Analysis (PRISMA)  
6 guidelines (Moher et al., 2009). We used the following inclusion criteria in our  
7 systematic review: (a) quantitative studies, (b) studies that report the relationship  
8 between social support and resilience, (c) studies that include nurses, (d) studies  
9 published in English. We collected the following data for each study included in the  
10 review: first author and year of publication, country, data collection time, sample size,  
11 age, study design, sampling method, and the main finding about the relationship  
12 between social support and resilience. The Joanna Briggs Institute critical appraisal  
13 tool was used to assess the risk of bias among the studies included in the review  
14 (Santos et al., 2018). According to this tool, the risk of bias was estimated as low,  
15 moderate and high.

16

## 17 **Results**

18 The flow diagram of the systematic review according to PRISMA guidelines is shown  
19 in Figure 1. After the first search in the databases and the removal of the duplicate  
20 records we found 13,232 records. Applying the inclusion criteria, the total number of  
21 studies that were included in the review was six.

22 Main characteristics of the six studies included in the systematic review are shown in  
23 Table 1. Two studies were conducted in China (Liu et al., 2018; Wang et al., 2018),  
24 two studies in Turkey (Kılınc & Sis Çelik, 2021; Öksüz et al., 2019), one study in  
25 Haiti (Caton, 2021), and one study in Taiwan (Hsieh et al., 2017). Studies were  
26 conducted through 2013-2020. The minimum sample size was 50 nurses, while the

1 maximum sample size was 747 nurses. All studies were cross-sectionals and used  
2 convenience samples. Risk of bias of studies is shown in Table 2. All studies had a  
3 low level of bias.

4 All studies found a positive relationship between social support and resilience among  
5 nurses. Three studies measured social support in general (Caton, 2021; Liu et al.,  
6 2018; Öksüz et al., 2019), while the other three studies measured family support,  
7 friends support, and coworkers support (Hsieh et al., 2017; Kılınc & Sis Çelik, 2021;  
8 Wang et al., 2018). Three studies used multivariable analysis to eliminate confounders  
9 (Caton, 2021; Hsieh et al., 2017; Wang et al., 2018), while the other three studies  
10 found the correlation coefficient between social support and resilience without  
11 eliminating confounding (Kılınc & Sis Çelik, 2021; Liu et al., 2018; Öksüz et al.,  
12 2019). In studies that used multivariable analysis, coefficient beta ranged from 0.13 to  
13 0.69, while in studies that used correlation analysis, correlation coefficient ranged  
14 from 0.18 to 0.37.

15

## 16 **Discussion**

17 We conducted a systematic review to find the relationship between social support  
18 and resilience among nurses. We identified six studies that were conducted in four  
19 countries; China, Turkey, Haiti and Taiwan. All studies found a positive relationship  
20 between social support and resilience.

21 The support that nurses receive proves to be a key parameter in enhancing their  
22 resilience, as it enables nurses to manage more effectively the negative emotions they  
23 experience due to their work (Kılınc & Sis Çelik, 2021). More specifically, nurses  
24 work under highly stressful conditions and support from others reinforces their belief  
25 that they are not alone in dealing with their problems, but instead can find support and  
26 help.

1 In fact, the more support nurses receive, the better the way they manage the stress  
2 they experience. Moreover, greater support enables nurses to better adapt to  
3 demanding circumstances both at the professional and personal level. In this case, it is  
4 necessary to have an in-depth understanding of the nurses' family, friends and  
5 professional environment so that we can provide them with the best possible support  
6 network. This will enable nurses to strengthen their resilience, face their work with  
7 more enthusiasm and better manage the various mental health issues (Liu et al., 2018).

8 Support from family is particularly important, as it reduces the feeling of loneliness in  
9 dealing with problems and makes it easier to manage problems (Fu et al., 2018;  
10 Orgambídez-Ramos & de Almeida, 2017). In addition, support from family or  
11 relatives has a positive impact on the physical and mental health of nurses working in  
12 hospitals (Fu et al., 2018; Sun et al., 2017).

13 Moreover, support from coworkers increase resilience through an indirect effect of  
14 self-efficacy (Wang et al., 2018). This kind of support is very important for early  
15 career nurses since they must adapt in a difficult work environment. Supportive work  
16 environment strength employees and improve job performance. Colleagues can  
17 significantly help inexperienced nurses to cope more effectively with difficult clinical  
18 situations as well as professional challenges by providing them with emotional  
19 support, advice and professional help in the hospital setting (Welsh, 2014). Peer  
20 support can alleviate stress, reduce psychological problems and increase the  
21 likelihood of young nurses staying in the profession (Hall, 2007).

22 It is noted that some categories of nurses have reduced resilience. For example, nurses  
23 working in psychiatric hospitals, nurses who do not have a permanent employment  
24 relationship with the hospital where they work and nurses who work more often on a  
25 rotational basis have more problems due to their reduced resilience (Liu et al., 2018).

26 It is also important that women have lower resilience than men (Aburn et al., 2016;  
27 Öksüz et al., 2019). Therefore, special attention needs to be paid to these categories of

1 nurses, especially by motivating nurses and strengthening their ambitions for a better  
2 professional future.

3 Our systematic review had several limitations. First, we searched in five databases  
4 using specific keywords. Second, all studies were cross-sectional and thus a causal  
5 relationship between social support and resilience could not be established. Third,  
6 three out of six studies did not multivariable analysis to eliminate confounding. Forth,  
7 the number of studies was low. Fifth, three studies calculated a coefficient beta and  
8 three studies calculated a correlation coefficient. Thus, we cannot perform a meta-  
9 analysis to provide a pooled estimation of the relationship between social support and  
10 resilience due to the low number of studies.

11 In conclusion, social support improves resilience of nurses. Therefore, it is necessary  
12 to make systematic efforts to support nurses especially in the workplace. This need is  
13 even greater for inexperienced nurses, as it is more difficult for them to cope  
14 effectively with the difficulties of the profession. For instance, nurse managers in  
15 hospitals could arrange workshops, talk of the trouble, training sessions, working  
16 group activities, regular meetings, and seminars to improve resilience among nurses.  
17 A harmonious working environment is essential to reduce the psychological pressure  
18 of nurses and improve job performance.

19

20



1

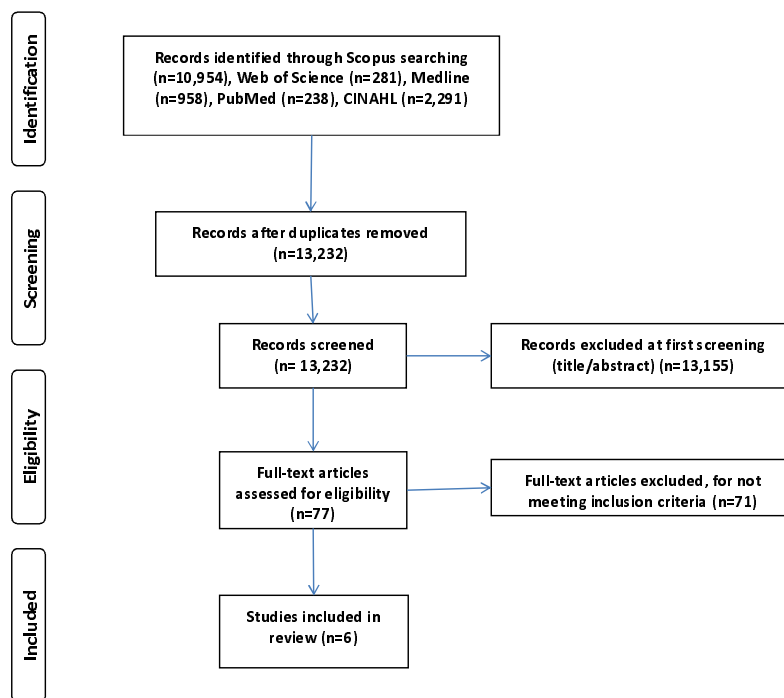

2

3 **Figure 1.** The flow diagram of the systematic review according to PRISMA  
4 guidelines.

5

6

1 **Table 1.** Main characteristics of the studies included in the systematic review.

| First author and year of publication | Country | Data collection time           | Sample size (n) | Age, mean (standard deviation)     | Study design    | Sampling method    | Main findings                                                                                                                                                                                                                  |
|--------------------------------------|---------|--------------------------------|-----------------|------------------------------------|-----------------|--------------------|--------------------------------------------------------------------------------------------------------------------------------------------------------------------------------------------------------------------------------|
| (Caton, 2021)                        | Haiti   | September 2018 to January 2019 | 50              | 43 (5.7)                           | Cross-sectional | Convenience sample | Multivariable analysis showed that social support increases resilience (coefficient beta = 0.69, p-value < 0.001)                                                                                                              |
| (Hsieh et al., 2017)                 | Taiwan  | June to December 2013          | 230             | ≤30 years, 61.7%; >30 years, 38.3% | Cross-sectional | Convenience sample | Multivariable analysis showed that family support (coefficient beta = 0.13, p-value = 0.031) and peer support (coefficient beta = 0.17, p-value = 0.006) increase resilience                                                   |
| (Kılınc & Sis Çelik, 2021)           | Turkey  | April 2020                     | 370             | ≤40 years, 91.1%; >40 years, 8.9%  | Cross-sectional | Convenience sample | Correlation analysis showed that family support (r = 0.34, p-value < 0.001), friends support (r = 0.37, p-value < 0.001), and support by significant others (r = 0.38, p-value < 0.001) was related positively with resilience |
| (Liu et al., 2018)                   | China   | May 2017                       | 183             | 34.1 (7.2)                         | Cross-sectional | Convenience sample | Correlation analysis showed that social support was related positively with resilience (r = 0.22, p-value < 0.01)                                                                                                              |
| (Öksüz et al., 2019)                 | Turkey  | November 2015 to February 2016 | 242             | ≤30 years, 42.2%; >30 years, 57.8% | Cross-sectional | Convenience sample | Correlation analysis showed that social support was related positively with resilience (r = 0.18, p-value = 0.006)                                                                                                             |
| (Wang et al., 2018)                  | China   | August to November 2015        | 747             | 23.5 (1.7)                         | Cross-sectional | Convenience sample | Multivariable analysis showed that coworker support (coefficient beta = 0.13, p-value = 0.017) increases resilience                                                                                                            |

2

3

1 Table 2. Quality of studies included in this systematic review.

|                                                                             | (Caton, 2021) | (Hsieh et al., 2017) | (Kılınç & Sis Çelik, 2021) | (Liu et al., 2018) | (Öksüz et al., 2019) | (Wang et al., 2018) |
|-----------------------------------------------------------------------------|---------------|----------------------|----------------------------|--------------------|----------------------|---------------------|
| 1. Were the criteria for inclusion in the sample clearly defined?           | Yes           | Yes                  | No                         | No                 | No                   | Yes                 |
| 2. Were the study subjects and the setting described in detail?             | Yes           | Yes                  | Yes                        | Yes                | Yes                  | Yes                 |
| 3. Was the exposure measured in a valid and reliable way?                   | Yes           | NA                   | Yes                        | Yes                | Yes                  | NA                  |
| 4. Were objective, standard criteria used for measurement of the condition? | Yes           | Yes                  | Yes                        | Yes                | Yes                  | Yes                 |
| 5. Were confounding factors identified?                                     | Yes           | NA                   | NA                         | NA                 | NA                   | NA                  |
| 6. Were strategies to deal with confounding factors stated?                 | Yes           | NA                   | NA                         | NA                 | NA                   | NA                  |
| 7. Were the outcomes measured in a valid and reliable way?                  | Yes           | Yes                  | Yes                        | Yes                | Yes                  | Yes                 |
| 8. Was appropriate statistical analysis used?                               | Yes           | Yes                  | Yes                        | Yes                | Yes                  | Yes                 |
| <b>Risk of bias</b>                                                         | <b>Low</b>    | <b>Low</b>           | <b>Low</b>                 | <b>Low</b>         | <b>Low</b>           | <b>Low</b>          |

2 NA: not applicable

3

4

1 **References**

- 2 Aburn, G., Gott, M., & Hoare, K. (2016). What is resilience? An Integrative Review  
3 of the empirical literature. *Journal of Advanced Nursing*, 72(5), 980–1000.  
4 <https://doi.org/10.1111/jan.12888>
- 5 Cameron, F., & Brownie, S. (2010). Enhancing resilience in registered aged care  
6 nurses: Enhancing resilience in aged care nurses. *Australasian Journal on*  
7 *Ageing*, 29(2), 66–71. <https://doi.org/10.1111/j.1741-6612.2009.00416.x>
- 8 Caton, M. T. (2021). The impact of spirituality, social support, and self-esteem on the  
9 resilience of Haitian nurses: Implications for nursing education. *Archives of*  
10 *Psychiatric Nursing*, 35(2), 206–212.  
11 <https://doi.org/10.1016/j.apnu.2020.08.006>
- 12 Edwards, D., Burnard, P., Bennett, K., & Hebden, U. (2010). A longitudinal study of  
13 stress and self-esteem in student nurses. *Nurse Education Today*, 30(1), 78–84.  
14 <https://doi.org/10.1016/j.nedt.2009.06.008>
- 15 Fu, C.-Y., Yang, M.-S., Leung, W., Liu, Y.-Y., Huang, H.-W., & Wang, R.-H. (2018).  
16 Associations of professional quality of life and social support with health in  
17 clinical nurses. *Journal of Nursing Management*, 26(2), 172–179.  
18 <https://doi.org/10.1111/jonm.12530>
- 19 Hall, D. S. (2007). The relationship between supervisor support and registered nurse  
20 outcomes in nursing care units. *Nursing Administration Quarterly*, 31(1), 68–  
21 80. <https://doi.org/10.1097/00006216-200701000-00015>
- 22 Hsieh, H.-F., Chang, S.-C., & Wang, H.-H. (2017). The relationships among  
23 personality, social support, and resilience of abused nurses at emergency  
24 rooms and psychiatric wards in Taiwan. *Women & Health*, 57(1), 40–51.  
25 <https://doi.org/10.1080/03630242.2016.1150385>
- 26 Jackson, D., Firtko, A., & Edenborough, M. (2007). Personal resilience as a strategy  
27 for surviving and thriving in the face of workplace adversity: A literature

- 1 review. *Journal of Advanced Nursing*, 60(1), 1–9.  
2 <https://doi.org/10.1111/j.1365-2648.2007.04412.x>
- 3 Kılınç, T., & Sis Çelik, A. (2021). Relationship between the social support and  
4 psychological resilience levels perceived by nurses during the COVID-19  
5 pandemic: A study from Turkey. *Perspectives in Psychiatric Care*, 57(3),  
6 1000–1008. <https://doi.org/10.1111/ppc.12648>
- 7 Liu, X.-X., Liu, W.-H., Ping, M., Li, C.-Y., Liu, X.-Y., & Song, P. (2018).  
8 Correlation between resilience and social support and anxiety in obstetric  
9 nurses. *Frontiers of Nursing*, 5(4), 311–315. [https://doi.org/10.1515/fon-2018-](https://doi.org/10.1515/fon-2018-0040)  
10 0040
- 11 Matos, P. S., Neushotz, L. A., Griffin, M. T. Q., & Fitzpatrick, J. J. (2010). An  
12 exploratory study of resilience and job satisfaction among psychiatric nurses  
13 working in inpatient units: Resilience and job satisfaction. *International*  
14 *Journal of Mental Health Nursing*, 19(5), 307–312.  
15 <https://doi.org/10.1111/j.1447-0349.2010.00690.x>
- 16 McAllister, M., & McKinnon, J. (2009). The importance of teaching and learning  
17 resilience in the health disciplines: A critical review of the literature. *Nurse*  
18 *Education Today*, 29(4), 371–379. <https://doi.org/10.1016/j.nedt.2008.10.011>
- 19 McCann, C. M., Beddoe, E., McCormick, K., Huggard, P., Kedge, S., Adamson, C.,  
20 & Huggard, J. (2013). Resilience in the health professions: A review of recent  
21 literature. *International Journal of Wellbeing*, 3(1), 60–81.  
22 <https://doi.org/10.5502/ijw.v3i1.4>
- 23 Mealer, M., Jones, J., Newman, J., McFann, K. K., Rothbaum, B., & Moss, M.  
24 (2012). The presence of resilience is associated with a healthier psychological  
25 profile in intensive care unit (ICU) nurses: Results of a national survey.  
26 *International Journal of Nursing Studies*, 49(3), 292–299.  
27 <https://doi.org/10.1016/j.ijnurstu.2011.09.015>

- 1 Moher, D., Liberati, A., Tetzlaff, J., Altman, D. G., & The PRISMA Group. (2009).  
2 Preferred Reporting Items for Systematic Reviews and Meta-Analyses: The  
3 PRISMA Statement. *PLoS Medicine*, 6(7), e1000097.  
4 <https://doi.org/10.1371/journal.pmed.1000097>
- 5 Öksüz, E., Demiralp, M., Mersin, S., Tüzer, H., Aksu, M., & Sarkoc, G. (2019).  
6 Resilience in nurses in terms of perceived social support, job satisfaction and  
7 certain variables. *Journal of Nursing Management*, 27(2), 423–432.  
8 <https://doi.org/10.1111/jonm.12703>
- 9 Orgambídez-Ramos, A., & de Almeida, H. (2017). Work engagement, social support,  
10 and job satisfaction in Portuguese nursing staff: A winning combination.  
11 *Applied Nursing Research*, 36, 37–41.  
12 <https://doi.org/10.1016/j.apnr.2017.05.012>
- 13 Phillips, C., Kenny, A., Esterman, A., & Smith, C. (2014). A secondary data analysis  
14 examining the needs of graduate nurses in their transition to a new role. *Nurse*  
15 *Education in Practice*, 14(2), 106–111.  
16 <https://doi.org/10.1016/j.nepr.2013.07.007>
- 17 Rogers, A. E., Hwang, W.-T., Scott, L. D., Aiken, L. H., & Dinges, D. F. (2004). The  
18 working hours of hospital staff nurses and patient safety. *Health Affairs*  
19 *(Project Hope)*, 23(4), 202–212. <https://doi.org/10.1377/hlthaff.23.4.202>
- 20 Santos, W. M. dos, Secoli, S. R., & Püschel, V. A. de A. (2018). The Joanna Briggs  
21 Institute approach for systematic reviews. *Revista Latino-Americana de*  
22 *Enfermagem*, 26(0). <https://doi.org/10.1590/1518-8345.2885.3074>
- 23 Sun, N., Lv, D.-M., Man, J., Wang, X., Cheng, Q., Fang, H., Fu, Z., Liu, S., & Wu, Q.  
24 (2017). The correlation between quality of life and social support in female  
25 nurses. *Journal of Clinical Nursing*, 26(7–8), 1005–1010.  
26 <https://doi.org/10.1111/jocn.13393>
- 27 Wang, L., Tao, H., Bowers, B. J., Brown, R., & Zhang, Y. (2018). Influence of Social  
28 Support and Self-Efficacy on Resilience of Early Career Registered Nurses.

1           *Western Journal of Nursing Research*, 40(5), 648–664.

2           <https://doi.org/10.1177/0193945916685712>

3    Watson, R., Deary, I., Thompson, D., & Li, G. (2008). A study of stress and burnout

4           in nursing students in Hong Kong: A questionnaire survey. *International*

5           *Journal of Nursing Studies*, 45(10), 1534–1542.

6           <https://doi.org/10.1016/j.ijnurstu.2007.11.003>

7    Welsh, D. (2014). Self-Efficacy Measurement and Enhancement Strategies for

8           Medical-Surgical Clinical Nurses. *Medsurg Nursing: Official Journal of the*

9           *Academy of Medical-Surgical Nurses*, 23(6), 371–377.

10
